# Supplementary material
Source: PubMed Central journal article supplement (PMC2600587)
Supplement: NIHMS58812-supplement-2.pdf [file NIHMS58812-supplement-2.pdf]

Type of file: figure

Label: 1

Filename: UStag\_SupFig1\_Shen.jpg

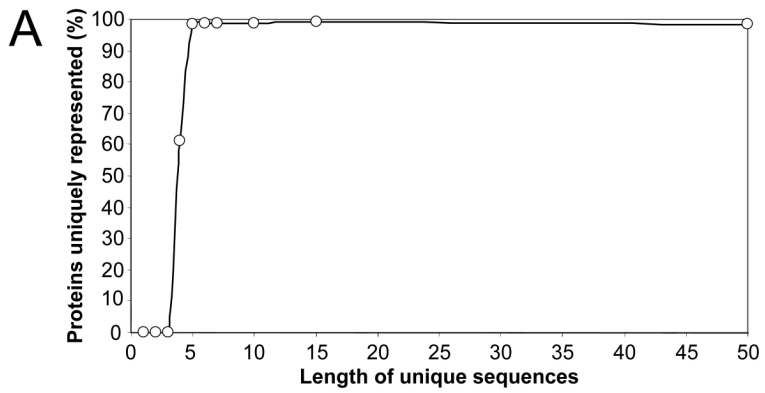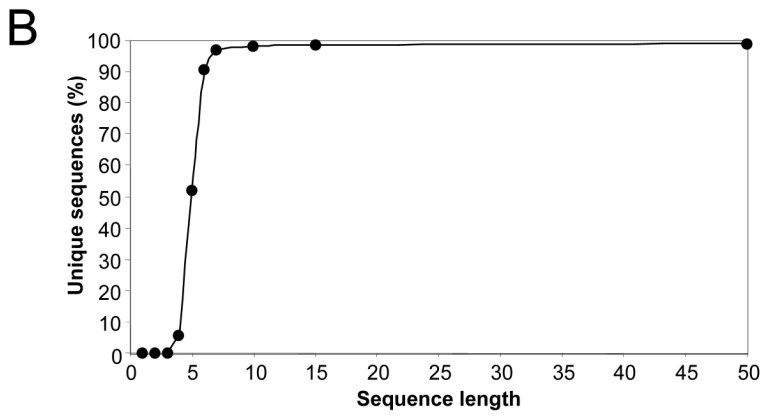

Supplementary Figure 1.

Type of file: figure

Label: 10

Filename: UStag\_SupFig10\_Shen.jpg

•Input:

1, ..., n //spectra (peaks)  
1, ..., 10 //SEQUEST candidates  
1, ..., m //list of residual replacements used in RRF  
Mp //molecular mass error threshold  
Ms //residual sequencing error threshold

•Processing:

for every candidate

    if correct parent mass (within the Mp of expected)

        generate b and y fragment masses

        identify fragments (within the Ms of expected residue mass)

        use consecutive fragments to produce sequence tags

        for every tag

            use RRF to determine if UStag

        if at least one tag is UStag

            candidate is identified

    else

        explore modifications with obtained Stags and delta mass

•Output:

UStags-based unambiguous identifications

Type of file: figure

Label: 2

Filename: UStag\_SupFig2\_Shen.jpg

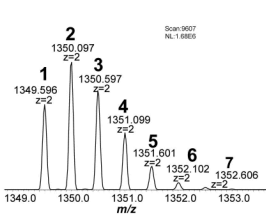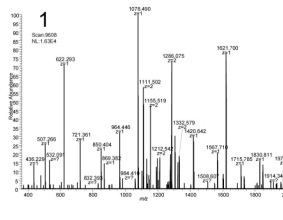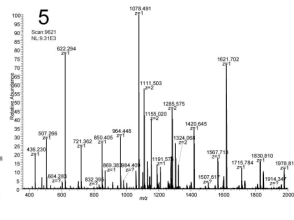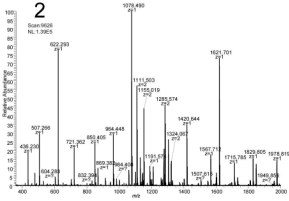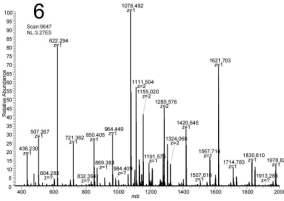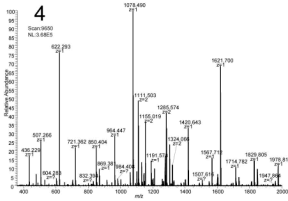

Supplementary Figure 2.

Type of file: figure

Label: 3

Filename: UStag\_SupFig3\_Shen.jpg

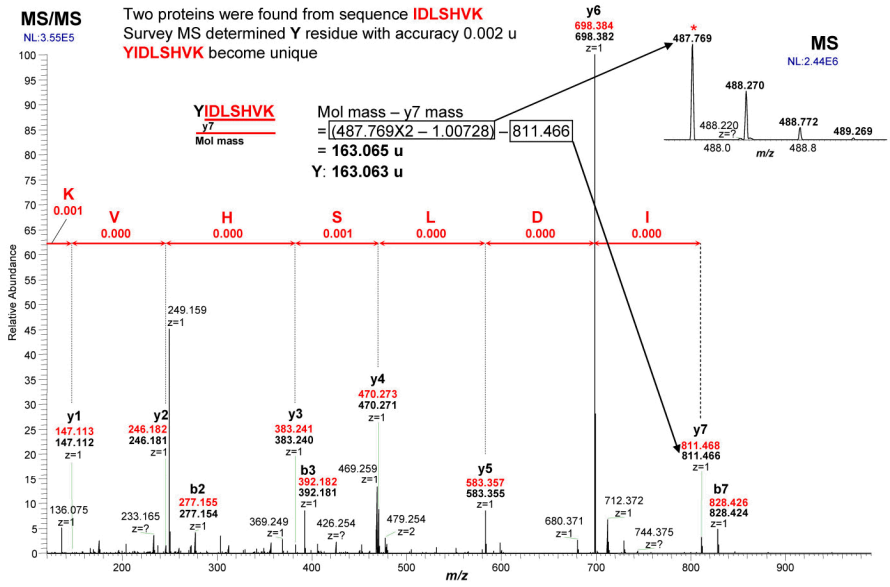

Supplementary Figure 3.



Type of file: figure

Label: 4

Filename: UStag\_SupFig4\_Shen.jpg

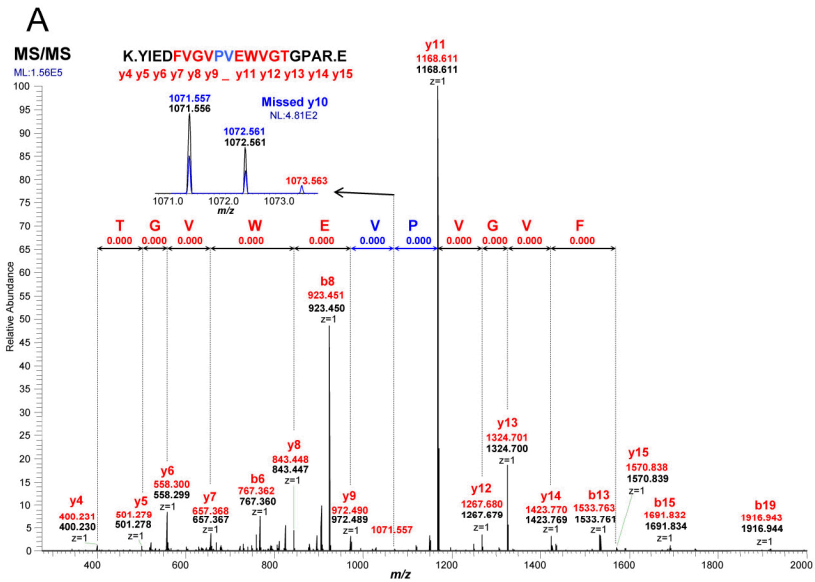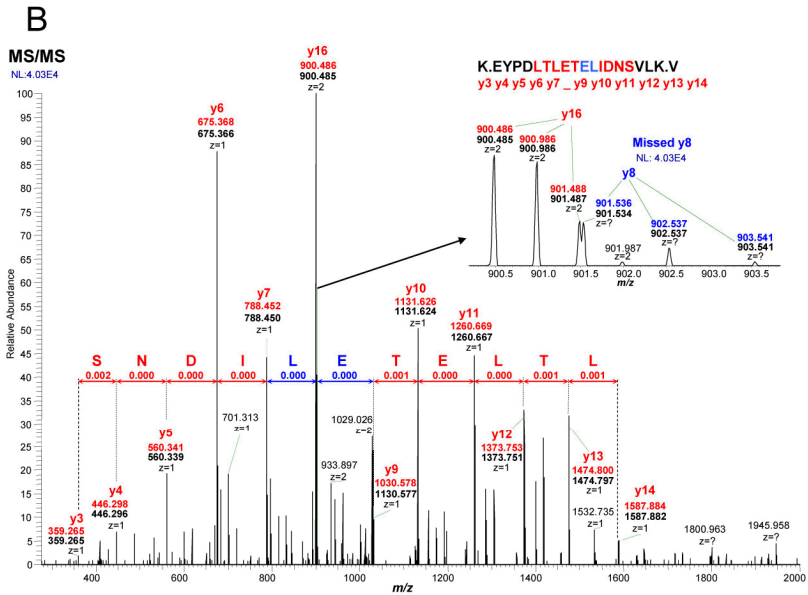

Supplementary Figure 4.

Type of file: figure

Label: 5

Filename: UStag\_SupFig5\_Shen.jpg

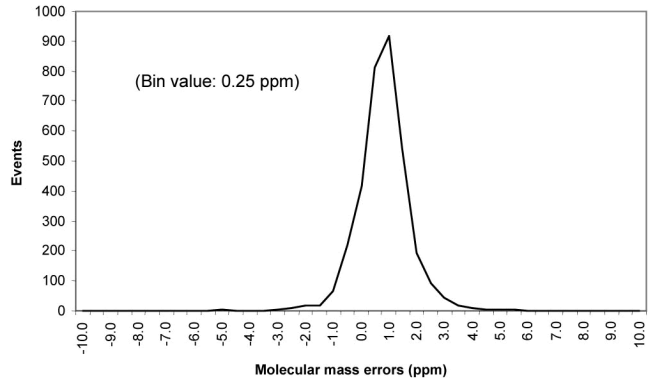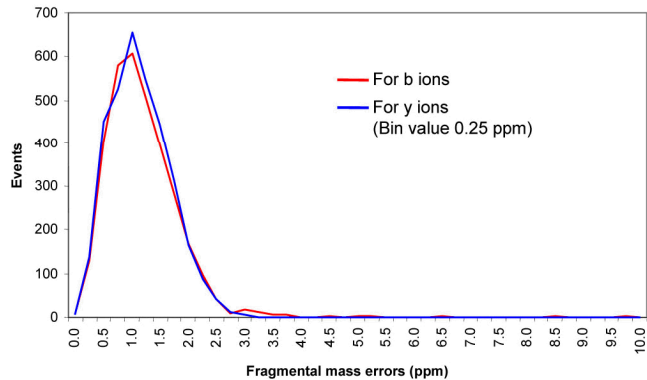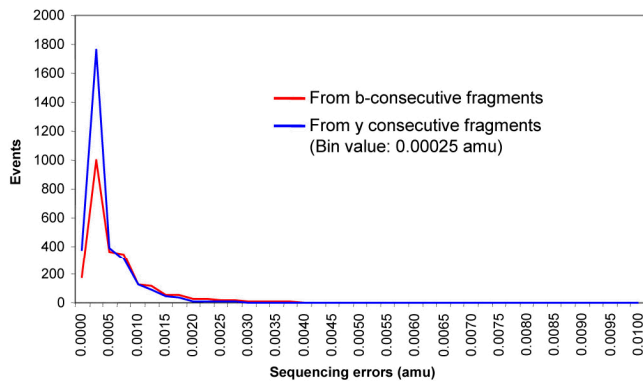

Supplementary Figure 5.

Type of file: figure

Label: 6

Filename: UStag\_SupFig6\_Shen.jpg

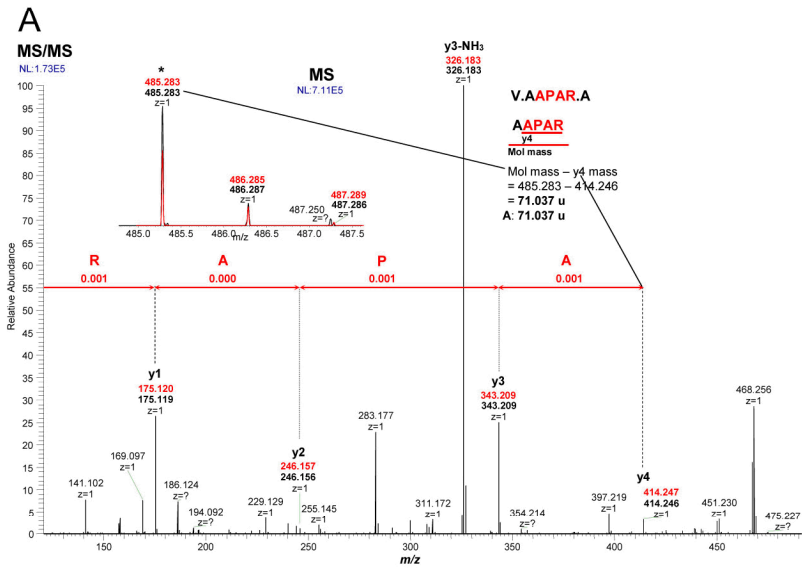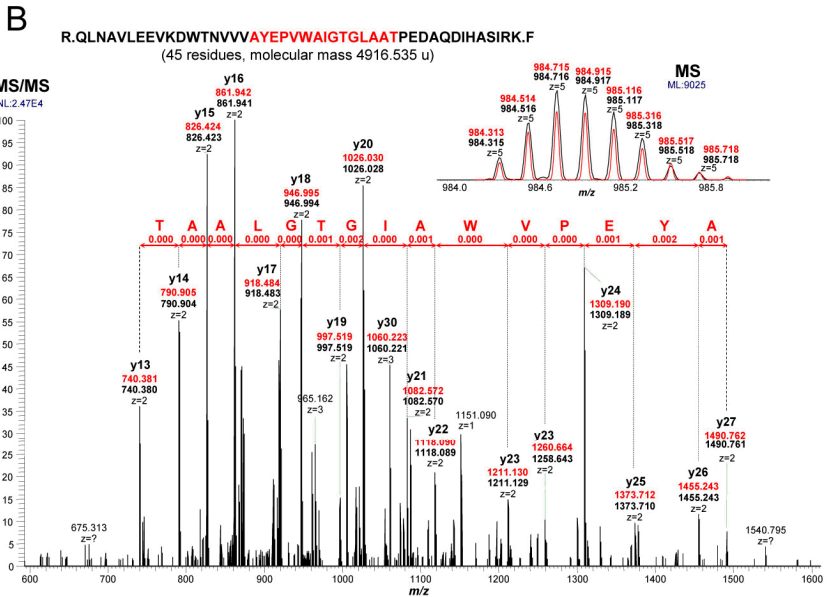

Supplementary Figure 6.

Type of file: figure

Label: 7

Filename: UStag\_SupFig7\_Shen.jpg

### A

#### MS/MS

NL: 2.65E4

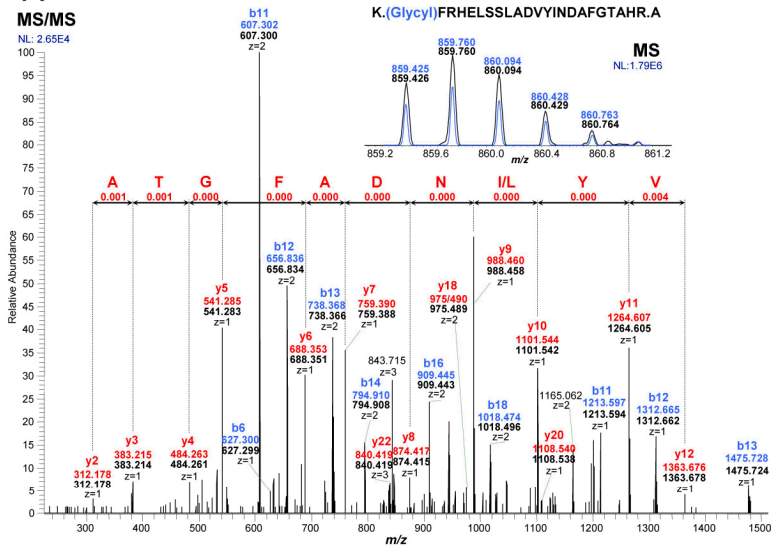

### B

#### MS/MS

NL: 9.30E4

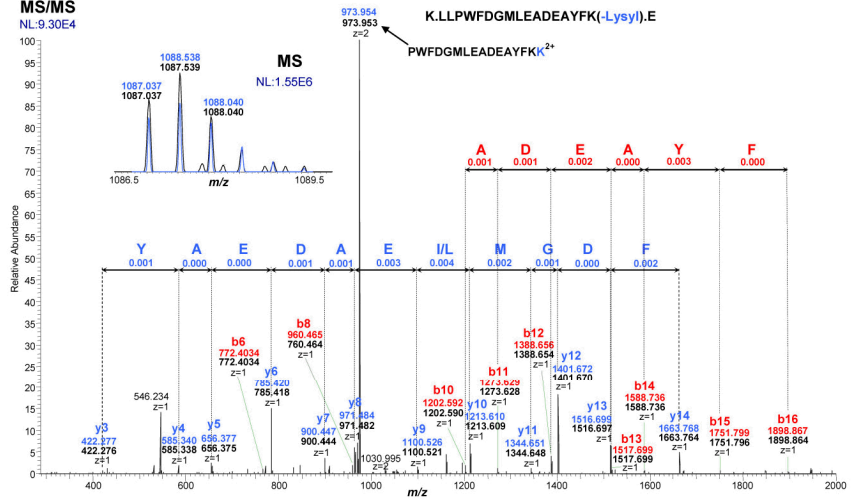

Supplementary Figure 7.



Type of file: figure

Label: 8

Filename: UStag\_SupFig8\_Shen.jpg

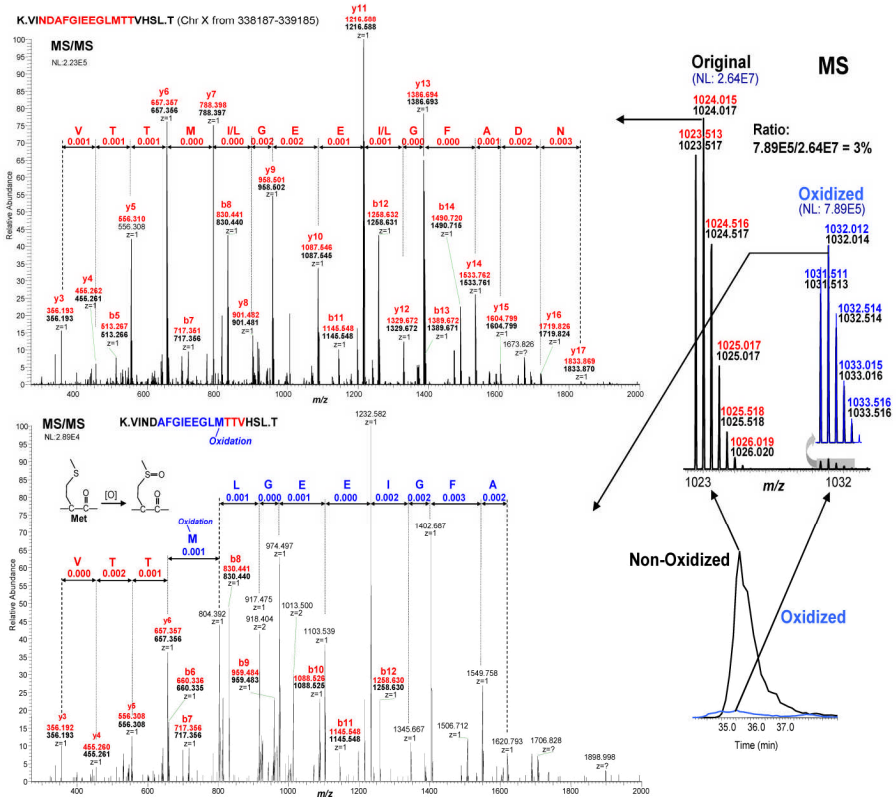

Supplementary Figure 8.

Type of file: figure

Label: 9

Filename: UStag\_SupFig9\_Shen.jpg

**A**

R.HIGKDTDVPAGDIGVGGRR.E (M<sup>+</sup>, Xcorr 5.108, 1<sup>st</sup>, from yeast Chr I from 31568-32941)  
 R.HIGQDTPVAGDIGVGGRR.E (M<sup>+</sup>, Xcorr 5.108, 1<sup>st</sup>, from yeast Chr XV from 1043038-1041674) } ΔCn = 0

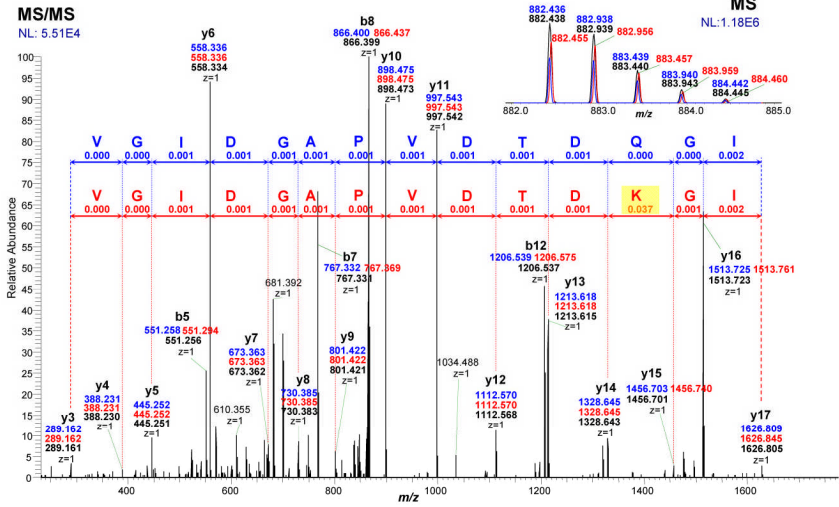**B**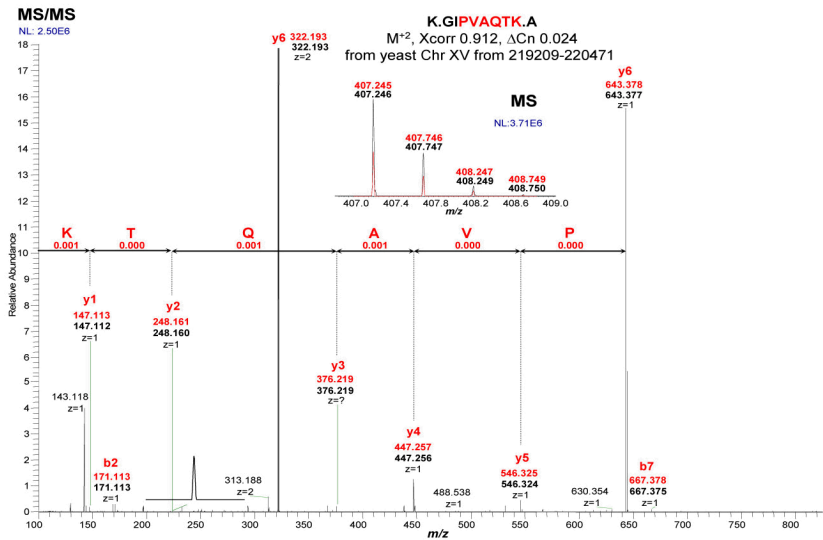

Supplementary Figure 9.
